# Supplementary material for: Building strength, endurance, and mobility using an astaxanthin formulation with functional training in elderly
Source: PubMed Central journal article supplement — J Cachexia Sarcopenia Muscle. 2018 Sep 26;9(5):826–33. doi: 10.1002/jcsm.12318 (PMC6204600; doi:10.1002/jcsm.12318), 2018-09-26
Supplement: JCSM-9-826-s001.pdf [file JCSM-9-826-s001.pdf]

## SUPPLEMENTAL MATERIAL

| <b>Table S1. Exclusion Criteria</b>                                                                                                                                                                                                                                                                              |
|------------------------------------------------------------------------------------------------------------------------------------------------------------------------------------------------------------------------------------------------------------------------------------------------------------------|
| 1. Have significant disease(s) or condition(s) that put the subject at risk                                                                                                                                                                                                                                      |
| 2. Hospitalized within 3 months for major atherosclerotic events                                                                                                                                                                                                                                                 |
| 3. Any metal implants in soft tissues                                                                                                                                                                                                                                                                            |
| 4. Implanted cardiac pacemaker or other non-MRI compatible implanted cardiac device                                                                                                                                                                                                                              |
| 5. Have chronic, uncontrolled hypertension as judged by the Investigator                                                                                                                                                                                                                                         |
| 6. BMI of $< 18$ or $> 32 \text{ kg/m}^2$                                                                                                                                                                                                                                                                        |
| 7. Creatinine clearance $< 45 \text{ mL/min}$                                                                                                                                                                                                                                                                    |
| 8. Laboratory or ECG abnormalities                                                                                                                                                                                                                                                                               |
| 9. Clinically significant abnormalities on physical examination (as judged by the Investigator)                                                                                                                                                                                                                  |
| 10. History or evidence of renal, hepatic, pulmonary (including chronic asthma), endocrine (eg, diabetes, hypo- and hyperthyroidism, adrenal insufficiency), central nervous or neurologic disorders (MS, epilepsy, history of seizures), or gastrointestinal (cirrhosis or viral hepatitis) system dysfunction, |
| 11. Claustrophobia                                                                                                                                                                                                                                                                                               |
| 12. Cancer, unless subject has documentation of completed curative treatment                                                                                                                                                                                                                                     |
| 13. History of serious mental illness as judged by the Investigator                                                                                                                                                                                                                                              |
| 14. Alcohol or drug abuse                                                                                                                                                                                                                                                                                        |
| 15. Are currently or within the last 30 days enrolled in a clinical trial involving an investigational product or nonapproved use of a drug or device or concurrently enrolled in any other type of medical research judged not to be scientifically or medically compatible with this study                     |
| 16. Donated or received blood or blood products within the past 30 days                                                                                                                                                                                                                                          |

The abbreviations are: BMI, body mass index.

**Table S2.** Treadmill time (min) and incline grade (%) during training at baseline (Pre), at the end (Post) and the change ( $\Delta$ Post-Pre) with the study.

|        | Pre           |              | Post          |              | Post-Pre      |              |
|--------|---------------|--------------|---------------|--------------|---------------|--------------|
|        | Time<br>(min) | Grade<br>(%) | Time<br>(min) | Grade<br>(%) | Time<br>(min) | Grade<br>(%) |
| PL-INT | 6.6±3.9       | 8.8±3.5      | 17.9±3.5      | 9.9±3.5      | 11.3±4.8      | 1.1±2.6      |
| PL-REC | 9.0±3.3       | 4.8±2.6      | 12.0±3.9      | 7.0±3.0      | 3.0±3.9       | 2.2±1.7      |
| AX-INC | 6.5±2.4       | 9.5±2.9      | 16.5±1.0      | 10.8±1.9     | 10.0±4.3      | 1.4±1.9      |
| AX-REC | 10.0±3.4      | 5.3±2.4      | 12.0±3.8      | 6.4±2.4      | 2.0±4.8       | 1.0±2.9      |

Values are means± SD Abbreviations are: PL – placebo, AX – Astaxanthin formulation, INT – interval, REC- recovery.

**Table S3.** Walking distance at baseline (Pre), at the end (Post) and the change ( $\Delta$ Post-Pre) with the study in the placebo (PL) and astaxanthin formulation (AX) fed groups.

| Walking distance (Meter) |              |              |                   |                 |
|--------------------------|--------------|--------------|-------------------|-----------------|
|                          | Pre          | Post         | $\Delta$ Post-Pre | <i>P</i>        |
| PL                       | 527 $\pm$ 74 | 568 $\pm$ 83 | 41 $\pm$ 65       | <i>P</i> <0.001 |
| AX                       | 530 $\pm$ 53 | 581 $\pm$ 53 | 48 $\pm$ 38       | <i>P</i> <0.01  |

Values are mean $\pm$ SD (paired t-test)

**Table S4:** Human TA muscle properties pre and post training and treatment in the placebo (PL) and astaxanthin formulation (AX) fed groups.

|                                                   | PL            | AX          |
|---------------------------------------------------|---------------|-------------|
| <b>Strength (MVC, N)</b>                          |               |             |
| Pre                                               | 88.6±25.7     | 83.2±23.0   |
| Post                                              | 87.4±18.7     | 91.4±19.2   |
| ΔPost-Pre                                         | -1.2±24.2     | 8.1±18.2    |
| <b>Muscle Size (CSA, mm<sup>2</sup>)</b>          |               |             |
| Pre                                               | 1030±214      | 1064±221    |
| Post                                              | 1035±214      | 1092±23     |
| ΔPost-Pre                                         | 5±43.6        | 28±48.0     |
| <b>Specific Force (MVC/CSA, N/mm<sup>2</sup>)</b> |               |             |
| Pre                                               | 0.09±0.017    | 0.08±0.024  |
| Post                                              | 0.09±0.022    | 0.09±0.024  |
| ΔPost-Pre                                         | -0.0002±0.044 | 0.007±0.019 |

Values are mean±SD. MVC: maximal volunteer contraction force; CSA, cross sectional area.

Figure S1A.

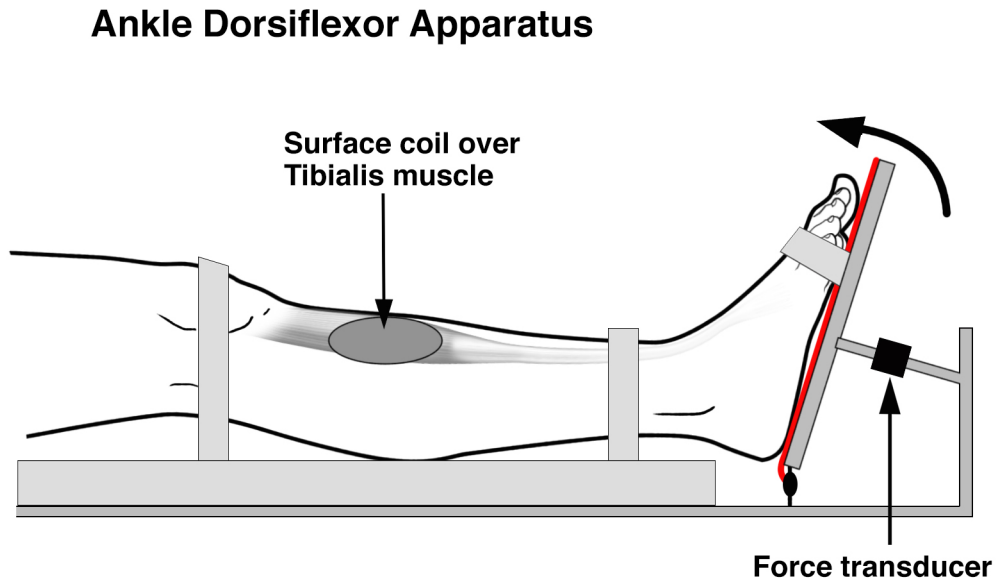

Figure S1B.

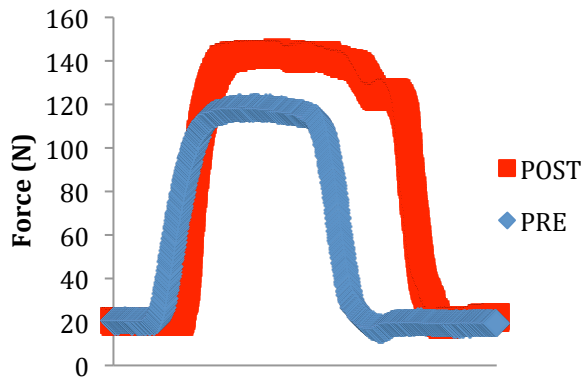

**Figure S1.** A) Apparatus for measuring muscle strength in ankle dorsiflexion, B) Example of a single maximum voluntary contraction at baseline and after three months of training in an Ax formulation treated human elderly subject.

Figure S2

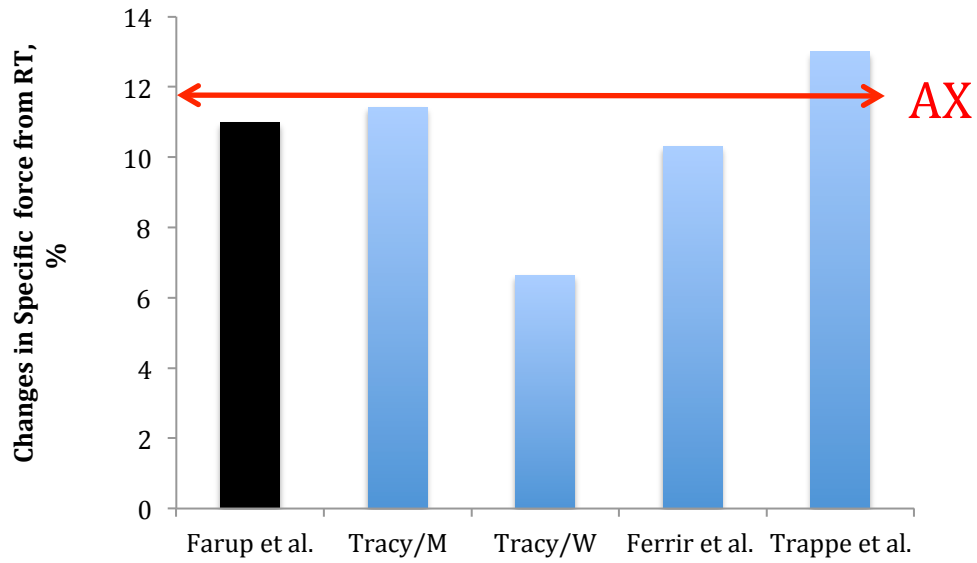

**Figure S2.** Specific force changes with resistance training (RT) and Ax treatment with exercise training (red arrow). Note: “Tracy/M” represents the older male average and “Tracy/W” represents the older female data. Farup et al. (black bar) training data from young adults; Tracy, Ferrir, and Trappe et al. data points all represents elderly (>65yr) subject training studies.

## LITERATURE CITED

1. Farup J, Kjolhede T, Sorensen H, et al. Muscle morphological and strength adaptations to endurance vs. resistance training. *J Strength Cond Res.* 2012;26(2):398-407.
2. Ferri A, Scaglioni G, Pousson M, Capodaglio P, Van Hoecke J, Narici MV. Strength and power changes of the human plantar flexors and knee extensors in response to resistance training in old age. *Acta Physiol Scand.* 2003;177(1):69-78.
3. Tracy BL, Ivey FM, Hurlbut D, et al. Muscle quality. II. Effects Of strength training in 65- to 75-yr-old men and women. *J Appl Physiol (1985).* 1999;86(1):195-201.
4. Trappe TA, Carroll CC, Dickinson JM, et al. Influence of acetaminophen and ibuprofen on skeletal muscle adaptations to resistance exercise in older adults. *American journal of physiology Regulatory, integrative and comparative physiology.* 2011;300(3):R655-662.
